# Supplementary material for: Impact of extrinsic incubation temperature on natural selection during Zika virus infection of Aedes aegypti and Aedes albopictus
Source: PLoS Pathog. 2021 Nov 9;17(11):e1009433. doi: 10.1371/journal.ppat.1009433 (PMC8629396; doi:10.1371/journal.ppat.1009433)
Supplement: S5 Table — (XLSX) [file ppat.1009433.s005.xlsx]

## Sheet: Sheet1
Temperature a	25°C
ZIKV Mutation b	T315I E	M220T NS1	K146E NS1	G83 NS5	F682 NS5	I94 NS2A	L330V E	W98G NS1	ZIKV-PR-IC
Total Samples (n c)	12	10	13	15	10	13	14	39	10
(n c) 100% competitor d	0	2	0	2	0	3	0	7	0
(n c) 90% competitor d	0	3	0	2	0	6	1	7	0
(n c) 80% competitor d	0	3	1	6	2	7	2	8	1
Proportion 100% competitor d	0	0.2	0	0.133333	0	0.230769	0	0.179487	0
Proportion 90% competitor d	0	0.3	0	0.133333	0	0.461538	0.0714286	0.179487	0
Proportion 80% competitor d	0	0.3	0.0769231	0.4	0.2	0.538462	0.142857	0.205128	0.1
Mean fixation of competitor d viruses	0.111111
Mean 90% of competitor d viruses	0.150794
Mean 80% of competitor d viruses	0.230159
Temperature a	35°C
ZIKV Mutation b	T315I E	M220T NS1	K146E NS1	G83 NS5	F682 NS5	I94 NS2A	L330V E	W98G NS1	ZIKV-PR-IC
Total Samples (n c)	26	22	41	15	12	15	12	15	5
(n c) 100% competitor d	2	15	8	5	6	8	3	3	0
(n c) 90% competitor d	2	16	10	7	6	9	3	5	0
(n c) 80% competitor d	2	16	13	8	7	10	5	6	0
Proportion 100% competitor d	0.0769231	0.681818	0.195122	0.333333	0.5	0.533333	0.25	0.2	0
Proportion 90% competitor d	0.0769231	0.727273	0.243902	0.466667	0.5	0.6	0.25	0.333333	0
Proportion 80% competitor d	0.0769231	0.727273	0.317073	0.533333	0.583333	0.666667	0.416667	0.4	0
Mean fixation of competitor d viruses	0.316456
Mean 90% of competitor d viruses	0.367089
Mean 80% of competitor d viruses	0.424051
a Extrinsic incubation temperature
b Engineered mutation incorporated to ZIKC-PR-IC
c number of samples
d Proportion of competitor virus compated to ZIKV-PR-IC
