# Supplementary material for: Impact of extrinsic incubation temperature on natural selection during Zika virus infection of Aedes aegypti and Aedes albopictus
Source: PLoS Pathog. 2021 Nov 9;17(11):e1009433. doi: 10.1371/journal.ppat.1009433 (PMC8629396; doi:10.1371/journal.ppat.1009433)
Supplement: S6 Table — (XLSX) [file ppat.1009433.s006.xlsx]

## Sheet: Seq Summary
	Table S1. NGS summary of ZIKV from mosquito tissues and intrahost variants accepted by LoFreq, related to Figure
sample	Species	Temp	DPI	Tissue (replicate) c	Copy # /mL	Total no. of reads a	% reads ZIKV	Cov. depth b	iSNV sites	SNP sites	INDEL sites	nt diversity (cds) e	nt diversity (snp) e	nt diversity (lp) e
25-Ag2-0-14L-13_S1	Ae. aegypti	25⁰C	14	Leg (A)	2820000	5474311	0.0277	1998.48	8	8	0	0.000125097	0.000125097	0
25-Ag2-0-14L-36_S2				Leg (B)	17400000	5582946	0.101	7415.46	2	2	0	9.84e-05	9.84e-05	0	12510.9
25-Ag2-0-14L-45_S3				Leg (C)	36800000	8224513	0.181	19809.1	30	30	0	0.000304089	0.000304089	0
25-Ag2-0-14M-13_S4				Midgut (A)	54200000	6674210	0.3392	30079.3	8	8	0	0.000203473	0.000203473	0
25-Ag2-0-14M-36_S5				Midgut (B)	50200000	7475366	0.1594	15957.8	3	3	0	9.57e-05	9.57e-05	0
25-Ag2-0-14M-45_S6				Midgut (C)	184400000	6688259	0.2555	22495.7	29	29	0	0.000161551	0.000161551	0
25-Ag2-0-14S-13_S96				Saliva (A)	10620	6414476	0.0026	217.916	13	13	0	0.000298578	0.000298578	0
25-Ag2-0-14S-36_S97				Saliva (B)	21000	8330706	0.0071	778.783	9	8	1	0.000157303	0.000144622	1.27e-05
25-Ag2-0-14S-45_S98				Saliva (C)	73600	8816495	0.0065	743.932	16	16	0	0.000244015	0.000244015	0
25-Ag-2-7L-27_S8			7	Leg (A)	540000	11264841	0.0035	528.274	7	7	0	0.000174946	0.000174946	0
25-Ag-2-7L-47_S9				Leg (B)	648000	11343324	0.0022	334.364	5	5	0	0.000286743	0.000286743	0
25-Ag-2-7L-6_S7				Leg (C)	488000	6192324	0.0037	305.504	8	7	1	0.000122308	0.000109297	1.3e-05
25-Ag-2-7M-27_S11				Midgut (A)	92200000	12903956	0.1157	20007.3	45	45	0	0.000209741	0.000209741	0
25-Ag-2-7M-47_S12				Midgut (B)	288000000	14776832	0.0842	16700.7	26	26	0	0.000185114	0.000185114	0
25-Ag-2-7M-6_S10				Midgut (C)	432000000	6657171	0.0985	8773.71	8	8	0	0.000137195	0.000137195	0
28-Ag-2-14L-19_S13		28⁰C	14	Leg (A)	12060000	8631013	0.0446	5162.96	7	7	0	0.000300025	0.000300025	0
28-Ag-2-14L-29_S14				Leg (B)	52000000	12120334	0.1062	17184.7	9	9	0	0.000247061	0.000247061	0
28-Ag-2-14L-33_S15				Leg (C)	97200000	20419985	0.1174	32069.8	14	13	1	0.000414653	0.000413072	1.58e-06
28-Ag-2-14M-19_S16				Midgut (A)	332000000	8665499	0.1497	17381.7	4	4	0	0.000292395	0.000292395	0
28-Ag-2-14M-29_S17				Midgut (B)	586000000	18488371	0.1957	48368.1	40	40	0	0.000229552	0.000229552	0
28-Ag-2-14M-33_S18				Midgut (C)	318000000	18484646	0.2067	51201.1	17	17	0	0.000242095	0.000242095	0
28-Ag-2-14S-19_S99				Saliva (A)	910000	7761325	0.0211	2144.26	17	15	2	0.000362602	0.000354588	8.01e-06
28-Ag-2-14S-29_S100				Saliva (B)	556000	4132406	0.0067	353.907	14	10	4	0.000294528	0.000269829	2.47e-05
28-Ag-2-14S-33_S101				Saliva (C)	2080000	3279969	0.0557	2375.93	18	17	1	0.000489767	0.000487266	2.5e-06
28-Ag-2-7L-13_S20			7	Leg (A)	1484000	13916975	0.0127	2375.6	6	6	0	0.000263696	0.000263696	0
28-Ag-2-7L-17_S21				Leg (B)	24200000	21770118	0.0074	2169.86	4	4	0	0.000174856	0.000174856	0
28-Ag-2-7L-6_S19				Leg (C)	118000000	8703459	0.0226	2620.61	18	17	1	0.00020382	0.00020177	2.05e-06
28-Ag-2-7M-13_S23				Midgut (A)	450000000	8114678	0.3401	36833.6	24	24	0	0.000233965	0.000233965	0
28-Ag-2-7M-17_S24				Midgut (B)	192000000	11948388	0.2263	36142.2	30	30	0	0.000214838	0.000214838	0
28-Ag-2-7M-6_S22				Midgut (C)	1078000000	23128145	0.0726	22468	40	40	0	0.000208143	0.000208143	0
28-Ag-2-7S-13_S92				Saliva (A)	7820000	18365239	0.0004	82.4767	4	4	0	0.00022439	0.00022439	0
28-Ag-2-7S-17_S104				Saliva (B)	558000	13171864	0.0009	151.359	8	7	1	0.000168429	0.000159093	9.34e-06
28-Ag-2-7S-6_S102				Saliva (C)	1742000	6065250	0.0043	339.271	18	16	2	0.000295922	0.000268364	2.76e-05
32-Ag-14L-14		32⁰C	14	Leg (A)	46400000	28308140	0.0391	14922.9	13	13	0	0.0002704	0.0002704	0
32-Ag-14L-35				Leg (B)	53400000	12010599	0.079	12826.5	20	20	0	0.000262514	0.000262514	0
32-Ag-14L-41				Leg (C)	19000000	46561778	0.0145	9184.51	13	13	0	0.000131257	0.000131257	0
32-Ag-14M-14				Midgut (A)	646000000	13733011	0.2482	45981.9	29	29	0	0.000229808	0.000229808	0
32-Ag-14M-35				Midgut (B)	782000000	13724452	0.3248	59795.7	40	39	1	0.000209196	0.000208202	9.94e-07
32-Ag-14M-41				Midgut (C)	640000000	17226801	0.1775	41194.2	18	18	0	0.000189978	0.000189978	0
32-Ag-14S-14				Saliva (A)	179400	6936923	0.0059	Cov. depth b	18	15	3	0.000327369	0.0003147	1.27e-05
32-Ag-14S-35				Saliva (B)	197600	15930283	0.0032	660.463	20	18	2	0.0003043	0.000287857	1.64e-05
32-Ag-14S-41				Saliva (C)	92000	24462484	0.0012	367.918	15	10	5	0.000242333	0.00020243	3.99e-05
32-Ag-7L-47			7	Leg (A)	23400000	16986201	0.02	4636.91	13	13	0	0.00027084	0.00027084	0
32-Ag-7L-54				Leg (B)	36800000	21176724	0.0183	5240.48	13	13	0	0.000301329	0.000301329	0
32-Ag-7L-55				Leg (C)	13440000	7849124	0.0123	1321.45	10	10	0	0.000198336	0.000198336	0
32-Ag-7M-47				Midgut (A)	494000000	11795286	0.2153	34447.7	26	26	0	0.000196954	0.000196954	0
32-Ag-7M-54				Midgut (B)	670000000	15708226	0.1915	40552.5	32	32	0	0.000187329	0.000187329	0
32-Ag-7M-55				Midgut (C)	2480000000	9042542	0.3733	45531.7	21	21	0	0.000204692	0.000204692	0
32-Ag-7S-47				Saliva (A)	154400	5368124	0.0025	184.02	13	13	0	0.000296038	0.000296038	0
32-Ag-7S-54				Saliva (B)	145200	25015532	0.0002	72.0729	4	4	0	9.33e-05	9.33e-05	0
32-Ag-7S-55				Saliva (C)	770000	3912356	0.0164	861.172	18	16	2	0.000277943	0.000270231	7.71e-06
35-Ag-2-7L-11_S31		35⁰C	7	Leg (A)	14380000	9435715	0.0377	4735.78	8	8	0	0.000294838	0.000294838	0
35-Ag-2-7L-19_S32				Leg (B)	18080000	8380399	0.0714	7951.94	8	8	0	0.000215693	0.000215693	0
35-Ag-2-7L-20_S33				Leg (C)	14900000	4313893	0.1277	7330.52	5	5	0	0.000296661	0.000296661	0
35-Ag-2-7M-11_S34				Midgut (A)	228000000	9846467	0.1532	20135.7	9	9	0	0.000221349	0.000221349	0
35-Ag-2-7M-19_S35				Midgut (B)	132600000	3058273	0.1017	4129.97	3	3	0	0.000196902	0.000196902	0
35-Ag-2-7M-20_S36				Midgut (C)	678000000	5194522	0.3725	25898.7	17	17	0	0.000275851	0.000275851	0
35-Ag-2-7S-11_S108				Saliva (A)	432000	5294484	0.0273	1887.04	27	20	7	0.000377382	0.000351974	2.54e-05
35-Ag-2-7S-19_S109				Saliva (B)	76400	5372932	0.001	72.8213	11	9	2	0.00033215	0.00030678	2.54e-05
35-Ag-2-7S-20_S93				Saliva (C)	9720	8491506	0.0005	58.0798	5	5	0	0.000255251	0.000255251	0
35-Ag4-0-14L-3			14	Leg (D)	28800000	7849221	0.0484	5112.26	7	7	0	0.000284088	0.000284088	0
35-Ag4-0-14L-43				Leg (E)	21200000	6406632	0.0292	2535.32	6	4	2	0.000216731	0.000210258	6.47e-06
35-Ag4-0-14L-7				Leg (F)	16200000	4866001	0.0609	3996.42	5	5	0	0.000317349	0.000317349	0
35-Ag4-0-14M-3				Midgut (D)	176000000	5610653	0.1913	14632.5	22	22	0	0.000255139	0.000255139	0
35-Ag4-0-14M-43				Midgut (E)	268000000	8968724	0.218	26162.9	18	18	0	0.000201754	0.000201754	0
35-Ag4-0-14M-7				Midgut (F)	266000000	8725897	0.1583	18648.6	24	24	0	0.000230426	0.000230426	0
35-Ag4-0-14S-3				Saliva (D)	628000	25422986	0.0046	1573.83	22	19	3	0.000322482	0.000313202	9.28e-06
35-Ag4-0-14S-43				Saliva (E)	1904000	5354453	0.0361	2585.57	12	9	3	0.000229786	0.000220035	9.75e-06
35-Ag4-0-14S-7				Saliva (F)	1708000	27538574	0.0024	876.242	18	16	2	0.000259441	0.000254985	4.46e-06
35N-Ag3-0-14L-12_S28			14	Leg (A)	1700000000	7714494	0.1365	14002.2	11	11	0	0.000258851	0.000258851	0
35N-Ag3-0-14L-24_S29				Leg (B)	956000000	9036700	0.1465	17643.7	16	16	0	0.000304325	0.000304325	0
35N-Ag3-0-14L-30_S30				Leg (C)	1800000000	14784634	0.1117	21943.3	20	20	0	0.000282375	0.000282375	0
35N-Ag3-0-14M-12_S25				Midgut (A)	49400000	9826665	0.3537	46405.8	18	18	0	0.000275878	0.000275878	0
35N-Ag3-0-14M-24_S26				Midgut (B)	32200000	5677159	0.2891	21841.7	25	25	0	0.000237162	0.000237162	0
35N-Ag3-0-14M-30_S27				Midgut (C)	54200000	6805406	0.2873	25906.7	33	33	0	0.000218027	0.000218027	0
35N-Ag3-0-14S-12_S105				Saliva (A)	238000	5573553	0.0031	224.909	9	8	1	0.000319811	0.000299015	2.08e-05
35N-Ag3-0-14S-24_S106				Saliva (B)	149200	1949180	0.0013	32.4687	4	2	2	0.000161204	0.0001248	3.64e-05
35N-Ag3-0-14S-30_S107				Saliva (C)	1276000	26595662	0.0098	3452.07	22	20	2	0.000476783	0.000460143	1.66e-05
D-Ag2-0-14L-12_S37		25⁰-35⁰C	14	Leg (A)	8740000	3580461	0.1252	5921.93	10	10	0	0.000228036	0.000228036	0
D-Ag2-0-14L-27_S38				Leg (B)	20800000	11290631	0.0873	13148.5	11	11	0	0.000353925	0.000353925	0
D-Ag2-0-14L-32_S39				Leg (C)	26400000	4181020	0.1524	8444.32	14	13	1	0.000417978	0.000412792	5.19e-06
D-Ag2-0-14M-12_S40				Midgut (A)	108600000	4625258	0.4279	26528.7	11	11	0	0.000133272	0.000133272	0
D-Ag2-0-14M-27_S41				Midgut (B)	76600000	6814360	0.2023	18349.6	11	11	0	0.000266527	0.000266527	0
D-Ag2-0-14M-32_S42				Midgut (C)	16700000	2111075	0.1145	3223.74	18	18	0	0.000215291	0.000215291	0
D-Ag2-0-14S-12_S111				Saliva (A)	20200	9255529	0.0037	444.448	19	18	1	0.000312927	0.000305498	7.43e-06
D-Ag2-0-14S-27_S112				Saliva (B)	18140	19759639	0.0009	225.683	23	21	2	0.000460607	0.000447462	1.31e-05
D-Ag2-0-14S-32_S94				Saliva (C)	15800	7638697	0.0007	72.2861	11	10	1	0.000408934	0.000390003	1.89e-05
D-Ag2-0-7L-41_S43			7	Leg (A)	652000	9380921	0.0082	1024.27	13	13	0	0.000244158	0.000244158	0
D-Ag2-0-7L-42_S44				Leg (B)	1068000	7100825	0.0084	798.059	5	5	0	0.000215972	0.000215972	0
D-Ag2-0-7L-46_S45				Leg (C)	1876000	10130930	0.0108	1467.52	6	6	0	0.00017956	0.00017956	0
D-Ag2-0-7M-41_S46				Midgut (A)	78400000	5737435	0.2263	17399.2	11	11	0	0.000203294	0.000203294	0
D-Ag2-0-7M-42_S47				Midgut (B)	88000000	6886118	0.2424	22415.1	6	6	0	0.00025168	0.00025168	0
D-Ag2-0-7M-46_S48				Midgut (C)	128400000	9710840	0.1929	24900.6	9	9	0	0.000148016	0.000148016	0
D-Ag2-0-7S-41_S114				Saliva (A)	11960	2079544	0.0023	62.0962	7	6	1	0.00021045	0.000197293	1.32e-05
D-Ag2-0-7S-42_S115				Saliva (B)	9700	1799070	0.0023	55.4205	4	3	1	0.00017439	0.000131795	4.26e-05
D-Ag2-0-7S-46_S116				Saliva (C)	72600	24535689	0.0029	920.619	12	10	2	0.000233363	0.000224	9.36e-06
	Species	Temp	DPI	Tissue (replicate) c	Copy # /mL	Total no. of reads a	% reads ZIKV	Cov. depth b	iSNV sites	SNP sites	INDEL sites	nt diversity (cds) e	nt diversity (snp) e	nt diversity (lp) e
25-Alb-2-14L-10_S49	Ae. albopictus	25⁰C	14	Leg (A)	74000000	11894852	0.0915	14485.4	4	4	0	0.000198522	0.000198522	0
25-Alb-2-14L-14_S50				Leg (B)	264000000	15524135	0.1152	23751.7	2	2	0	9.29e-05	9.29e-05	0
25-Alb-2-14L-38_S51				Leg (C)	53400000	13888605	0.0002	30.1481	2	2	0	6.64e-05	6.64e-05	0
25-Alb-2-14M-10_S52				Midgut (A)	4040000000	11720955	0.3433	53757.2	31	31	0	0.000155633	0.000155633	0
25-Alb-2-14M-14_S53				Midgut (B)	6120000000	8497807	0.3986	45184.9	25	25	0	0.000161401	0.000161401	0
25-Alb-2-14M-38_S54				Midgut (C)	4120000000	5789575	0.3362	26064.8	23	23	0	0.000153777	0.000153777	0
25-Alb-2-14S-10_S117				Saliva (A)	63800	6865073	0.0005	40.9924	8	6	2	0.000311553	0.000233382	7.82e-05
25-Alb-2-14S-14_S118				Saliva (B)	220000	5481289	0.007	505.307	13	10	3	0.000158527	0.00014307	1.55e-05
25-Alb-2-14S-38_S95				Saliva (C)	3620	6609037	0.0002	20.1586	2	2	0	6.32e-05	6.32e-05	0
25-Alb-2-7L-14			7	Leg (A)	20800	150111	0.3367	646.358	17	14	3	0.000148419	0.000126043	2.23762e-05
25-Alb-2-7L-29				Leg (B)	12740	112456	0.0598	84.0248	8	7	1	0.000196295	0.000191378	4.91676e-06	11220.7
25-Alb-7L-40				Leg (C)	412000	528927	0.0446	310.46	8	8	0	0.000333	0.000333	0
25-Alb-2-7M-14				Midgut (A)	8480000	1769489	0.6517	15445.5	27	27	0	0.000158907	0.000158907	0
25-Alb-2-7M-29				Midgut (B)	28600000	39344	0.002	0.983529	0	0	0	0	0	0
25-alb-7M-40				Midgut (C)	8000000	435447	0.4722	2749.81	17	17	0	0.000159762	0.000159762	0
28-Al2-0-14L-18_S56		28⁰C	14	Leg (A)	3060000	6231408	0.1047	8658.93	18	18	0	0.000503269	0.000503269	0
28-Al2-0-14L-2_S55				Leg (B)	650000	3431245	0.0525	2391.95	6	6	0	0.000112782	0.000112782	0
28-Al2-0-14L-34_S57				Leg (C)	19800000	9542620	0.1456	18291.2	9	9	0	0.000192728	0.000192728	0
28-Al2-0-14M-18_S59				Midgut (A)	276000000	3379791	0.7429	33146.6	32	32	0	0.000204178	0.000204178	0
28-Al2-0-14M-2_S58				Midgut (B)	734000000	4869042	0.4261	27377.2	35	35	0	0.000172026	0.000172026	0
28-Al2-0-14M-34_S60				Midgut (C)	122800000	2071365	0.6547	17840.4	17	17	0	0.000138064	0.000138064	0
28-Al2-0-14S-18_S121				Saliva (A)	300000	6564404	0.0247	2120.53	23	20	3	0.000425113	0.00041803	7.08e-06
28-Al2-0-14S-2_S120				Saliva (B)	736000	8914496	0.0312	3624.96	10	7	3	6.25e-05	5.68e-05	5.77e-06
28-Al2-0-14S-34_S122				Saliva (C)	250000	6149421	0.0077	616.922	12	10	2	0.000222243	0.000213367	8.88e-06
28-Al2-0-7L-15			7	Leg (A)	2000000	16191698	0.0133	2862.84	23	16	7	0.000191239	0.00016337	2.78684e-05
28-Al2-0-7L-23				Leg (B)	794000	17084021	0.0049	1109.53	13	12	1	0.000318073	0.000314966	3.10699e-06
28-Al2-0-7L-46				Leg (C)	7160000	20983358	0.0194	5407.38	17	15	2	0.000268201	0.000264141	4.05968e-06
28-Al2-0-7M-15				Midgut (A)	244000000	12849057	0.0845	14438.5	24	24	0	0.000173021	0.000173021	0
28-Al2-0-7M-23				Midgut (B)	408000000	10874731	0.1475	21355.4	31	31	0	0.000172891	0.000172891	0
28-Al2-0-7M-46				Midgut (C)	460000000	13187862	0.1391	24482	25	25	0	0.000161255	0.000161255	0
28-Al2-0-7S-15				Saliva (A)	21200	3420869	0.0036	165.472	6	5	1	9.76864e-05	9.49738e-05	2.71262e-06
28-Al2-0-7S-46				Saliva (C)	72600	2709173	0.011	397.593	11	11	0	0.000410811	0.000410811	0
32-Al-14L-12		32⁰C	14	Leg (A)	47400000	9247726	0.1692	20665.8	31	27	4	0.000359262	0.000354842	4.41988e-06
32-Al-14L-17				Leg (B)	95400000	11993785	0.186	29504.9	10	10	0	0.000142435	0.000142435	0
32-Al-14L-24				Leg (C)	51200000	12048169	0.1827	29367.4	4	4	0	0.000106985	0.000106985	0
32-Al-14M-12				Midgut (A)	2600000000	6473475	0.5169	44445.6	29	29	0	0.000221617	0.000221617	0
32-Al-14M-17				Midgut (B)	1238000000	5940538	0.5214	41014.6	31	31	0	0.00018282	0.00018282	0
32-Al-14M-24				Midgut (C)	334000000	6216784	0.535	44068.5	29	29	0	0.000157192	0.000157192	0
32-Al-14S-12				Saliva (A)	9000000	2871904	0.2771	10553.3	21	18	3	0.000326887	0.000322889	3.99825e-06
32-Al-14S-17				Saliva (B)	260000	232030	0.0875	266.639	7	6	1	0.000214209	0.000207241	6.96797e-06
32-Al-14S-24				Saliva (C)	240000	490773	0.0384	246.328	13	10	3	0.000238271	0.000217518	2.0753e-05
32-Al-7L-20			7	Leg (A)	29200	14621226	0.0766	14914.9	28	27	1	0.000334718	0.00033326	1.45736e-06
32-Al-7L-32				Leg (B)	5620000	6886174	0.0429	3936.76	16	16	0	0.000218259	0.000218259	0
32-Al-7L-7				Leg (C)	10140000	14675060	0.0616	12116.2	25	23	2	0.000210303	0.000207633	2.66988e-06
32-Al-7M-20				Midgut (A)	10840000	6264920	0.4323	36110.7	25	25	0	0.000165475	0.000165475	0
32-Al-7M-32				Midgut (B)	164000000	6215531	0.4214	34964.2	26	26	0	0.000172182	0.000172182	0
32-Al-7M-7				Midgut (C)	115200000	7268119	0.2997	29220.1	22	22	0	0.000169329	0.000169329	0
32-Al-7S-20				Saliva (A)	248000	366460	0.07	339.117	17	15	2	0.000416718	0.000397563	1.9155e-05
32-Al-7S-32				Saliva (B)	62200000	112696885	0.007	10424	21	20	1	0.000189167	0.000187446	1.7205e-06
32-Al-7S-7				Saliva (C)	318000	509939	0.045	302.831	7	7	0	0.0002795	0.0002795	0
35-Alb-2-14L-16_S61		35⁰C	14	Leg (A)	48200000	2397204	0.128	4025.26	6	6	0	0.000393859	0.000393859	0
35-Alb-2-14L-24_S62				Leg (B)	17980000	4840193	0.1676	10771.1	6	6	0	0.000325715	0.000325715	0
35-Alb-2-14L-37_S63				Leg (C)	54200000	6400756	0.1937	16291.8	5	5	0	0.000305599	0.000305599	0
35-Alb-2-14M-16_S64				Midgut (A)	11100000	5348964	0.014	998.338	4	4	0	0.000374213	0.000374213	0
35-Alb-2-14M-24_S65				Midgut (B)	1464000000	13060788	0.1713	29763.6	24	24	0	0.000263128	0.000263128	0
35-Alb-2-14M-37_S66				Midgut (C)	216000000	5291176	0.3845	27089.1	12	12	0	0.000267938	0.000267938	0
35-Alb-2-14S-16_S123				Saliva (A)	14660	4164661	0.0012	64.9309	9	9	0	0.000379975	0.000379975	0
35-Alb-2-14S-24_S124				Saliva (B)	4140000	4959867	0.026	1681.62	13	10	3	0.000399341	0.000387531	1.18e-05
35-Alb-2-14S-37_S125				Saliva (C)	322000	3921628	0.006	302.884	14	14	0	0.000384058	0.000384058	0
35-Alb-2-7L-15			7	Leg (A)	51140000	476718	0.0709	443.793	9	9	0	0.000583324	0.000583324	0
35-Alb-2-7L-18				Leg (B)	33760000	379125	0.0202	100.136	4	4	0	0.0002625	0.0002625	0
35-Alb-2-7L-9				Leg (C)	15830000	513028	0.1156	758.63	7	4	3	0.000261485	0.000217022	4.44632e-05
35-Alb-2-7M-15				Midgut (A)	41000000	476406	0.3245	2051.27	13	13	0	0.000184974	0.000184974	0
35-Alb-2-7M-18				Midgut (B)	644400000	658975	0.3373	2969.97	15	15	0	0.000139769	0.000139769	0
35-Alb-2-7M-9				Midgut (C)	457600000	362063	0.3492	1651.1	13	9	4	0.000140933	0.000117937	2.29967e-05
D-Al2-0-14L-38_S67		25⁰-35⁰C	14	Leg (A)	6160000	1064451	0.0547	763.249	6	6	0	0.000430233	0.000430233	0
D-Al2-0-14L-41_S68				Leg (B)	4760000	1862646	0.0729	1812.79	7	7	0	0.000305994	0.000305994	0
D-Al2-0-14L-48_S69				Leg (C)	17200000	2179543	0.1235	3579.44	6	6	0	0.000393874	0.000393874	0
D-Al2-0-14M-38_S70				Midgut (A)	55800000	3027512	0.4016	16210.2	31	31	0	0.000193483	0.000193483	0
D-Al2-0-14M-41_S71				Midgut (B)	165600000	2411977	0.4161	13296.7	24	24	0	0.000192706	0.000192706	0
D-Al2-0-14M-48_S72				Midgut (C)	210000000	2865841	0.4621	17557.8	25	25	0	0.000150974	0.000150974	0
D-Al2-0-14S-38_S126				Saliva (A)	25800	6888366	0.0102	912.025	17	12	5	0.000520084	0.000450196	6.99e-05
D-Al2-0-14S-41_S127				Saliva (B)	46800	6180800	0.0121	977.283	14	10	4	0.000402658	0.000378163	2.45e-05
D-Al2-0-14S-48_S128				Saliva (C)	5680	4576506	0.0025	151.321	11	9	2	0.000458752	0.000447211	1.15e-05
D-Alb2-0-7L-13			7	Leg (A)	2.49347e+06	12456840	0.1345	22196.6	11	10	1	0.000194682	0.000193222	1.45979e-06
D-Alb2-0-7L-35				Leg (B)	5.3527e+06	16152339	0.0148	3187.35	7	6	1	0.000201609	0.000200228	1.38055e-06
D-Alb2-0-7L-7				Leg (C)	1.61812e+06	12801048	0.0363	6199.6	25	24	1	0.000347092	0.000345772	1.3199e-06
D-alb2-0-7M-13				Midgut (A)	8.86473e+06	12771118	0.0671	11491.2	5	4	1	0.000289773	0.000287644	2.12841e-06
D-alb2-0-7M-35				Midgut (B)	2.35378e+08	12739585	0.1344	22658.2	36	36	0	0.000184746	0.000184746	0
D-alb2-0-7M-7				Midgut (C)	4.65093e+07	11135540	0.1966	28977.3	23	23	0	0.000279791	0.000279791	0
	Species	Temp	DPI	Tissue (replicate) d	Copy # /mL	Total no. of reads a	% reads ZIKV	Cov. depth b	iSNV sites	SNP sites	INDEL sites	nt diversity (cds) e	nt diversity (snp) e	nt diversity (lp) e
PRVABC-59-1E6-1_S73	ZIKV PRVABC59c	N/A	N/A	Virus Stock (A)	N/A	8872562	0.1639	16324.6	18	18	0	0.000141097	0.000141097	0
PRVABC-59-1E6-2_S74				Virus Stock (B)	N/A	14647924	0.1262	20622.5	16	16	0	0.000143819	0.000143819	0
PRVABC-59-A	ZIKV PRVABC59c	N/A	N/A	Virus Stock (C)	N/A	5105354	0.6369	46669.5	18	18	0	0.000146112	0.000146112	0
PRVABC-59-B				Virus Stock (D)	N/A	4266471	0.6895	42305	19	19	0	0.00014832	0.00014832	0
PRVABC-59-C				Virus Stock (E)	N/A	10458068	0.515	75825.3	19	19	0	0.000149371	0.000149371	0
PRVABC-59_neat-A	ZIKV PRVABC59c	N/A	N/A	Virus Stock (F)	N/A	10930085	0.4595	66299.2	19	19	0	0.000146599	0.000146599	0
PRVABC-59_neat-B				Virus Stock (G)	N/A	12407214	0.4138	67596	19	19	0	0.000146934	0.000146934	0
PRVABC-59_neat-C				Virus Stock (H)	N/A	13260118	0.3871	67469.9	20	20	0	0.000149362	0.000149362	0
	NTC	N/A	N/A	NTC (A)	N/A	1222836	0.0004	6.91052	0	0	0	N/A	N/A	N/A
				NTC (B)	N/A	1280640	0.0002	3.23836	0	0	0	N/A	N/A	N/A
				NTC (C)	N/A	2794018	0.0002	7.18312	0	0	0	N/A	N/A	N/A
	a 175nt pairded-end reads from Illumina HiSeq 4000 (both reads represented in total) after duplicate removal (MarkDuplicates)
	b Average number of nucleotides sequenced per site.
	c Biological replicates
	d Technical replicates
	e nt diversity = sum of variant frequencies / cds sites
	DPI, days post infection; Cov, coverage; iSNV, intrahost single nucleotide variant; nt, nucleotide; CDS, coding sequence; SNP, single nucleotide polymorphism; lp, length polymorphism
